# Supplementary material for: Important Role of the Ihh Signaling Pathway in Initiating Early Cranial Remodeling and Morphological Specialization in Cromileptes altivelis
Source: MDPI journal article supplement (doi:10.3390/ani13243840), 2023-12-13
Supplement: s1 [file s1]

## Supplementary Material for:

### Important Role of the Ihh Signaling Pathway in Initiating Early Cranial Remodeling and Morphological Specialization in *Cromileptes altivelis*

Xiaoying Cao <sup>1</sup>, Shunyun Deng <sup>1</sup>, Quanyin Liu <sup>1</sup>, Lisheng Wu <sup>1,2</sup>, Xuan Zhang<sup>3</sup> and Shaoxiong Ding <sup>1,2,\*</sup>

<sup>1</sup> State Key Laboratory of Marine Environment Science, College of Ocean and Earth Sciences, Xiamen University, Xiamen 361102, China

<sup>2</sup> Xiamen Key Laboratory of Urban Sea Ecological Conservation and Restoration, College of Ocean and Earth Sciences, Xiamen University, Xiamen 361005, China

<sup>3</sup> Department of Biological Sciences, University of Arkansas, Fayetteville, AR, United States

\* Correspondence: sxding@xmu.edu.cn (S.D.)

**Table S1** Sample information

| Species               | Sample         | Total length | Wight       |
|-----------------------|----------------|--------------|-------------|
| <i>C. altivelis</i>   | CraltS001-S030 | 3.0-4.0 cm   | 1.0-1.8 g   |
|                       | CraltS101-S130 | 5.0-6.0 cm   | 2.3-2.9 g   |
|                       | CraltS201-S230 | 7.0-8.0 cm   | 7.8-9.5 g   |
|                       | CraltS301-S330 | 9.0-10.0 cm  | 14.5-17.8g  |
| <i>E. coioides</i>    | EpcoiS001-030  | 3.0-4.0 cm   | 0.9-1.7 g   |
|                       | EpcoiS101-130  | 5.0-6.0 cm   | 2.0-2.9 g   |
|                       | EpcoiS201-230  | 7.0-8.0 cm   | 8.0-10.0 g  |
|                       | EpcoiS301-330  | 9.0-10.0 cm  | 15.6-20.4 g |
| <i>E. lanceolatus</i> | EplanS001-030  | 3.0-4.0 cm   | 0.8-1.9 g   |
|                       | EplanS101-130  | 5.0-6.0 cm   | 2.1-3.0 g   |
|                       | EplanS201-230  | 7.0-8.0 cm   | 7.5-10.6 g  |
|                       | EplanS301-330  | 9.0-10.0 cm  | 16.9-20.5 g |

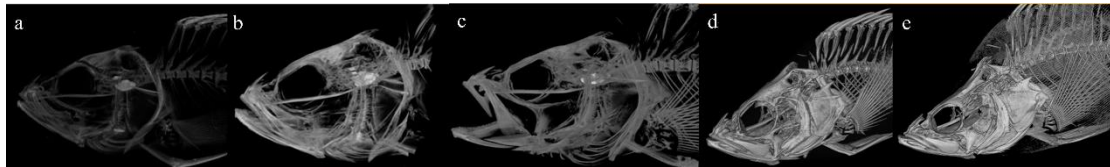

**Figure S1.** The skull CT scan and 3D reconstruction of *C. altivelis* at different developmental stages.  
a: 3cm; b: 5cm; c: 8cm; d: 10cm; e: 20cm.

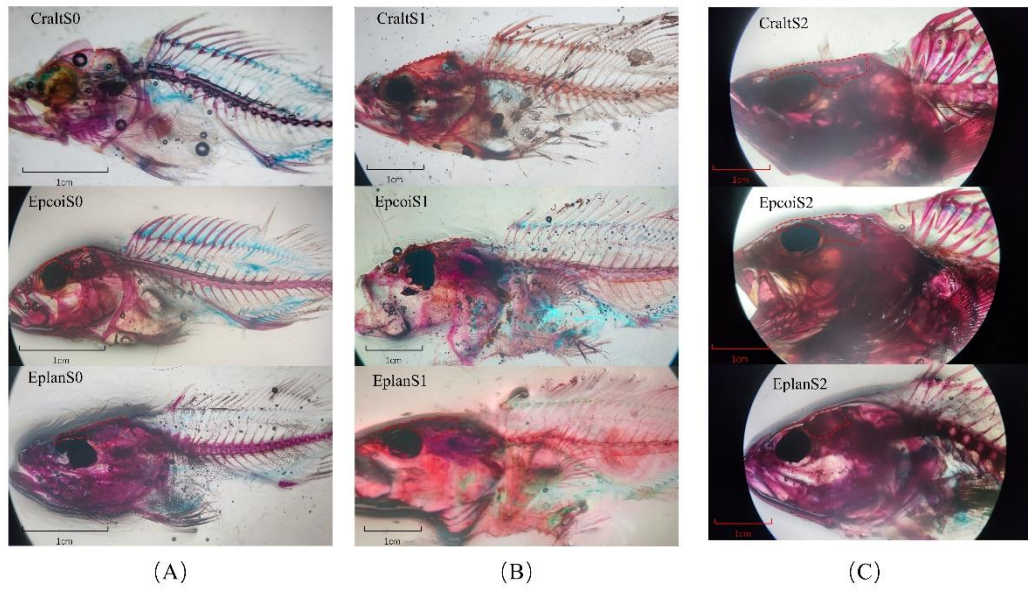

**Figure S2.** Transparent staining of *C. altivelis* and closely related species at S0-S2 developmental stages. Cralt: *C. altivelis*; Epcoi: *E. coioides*; Eplan: *E. lanceolatus*.

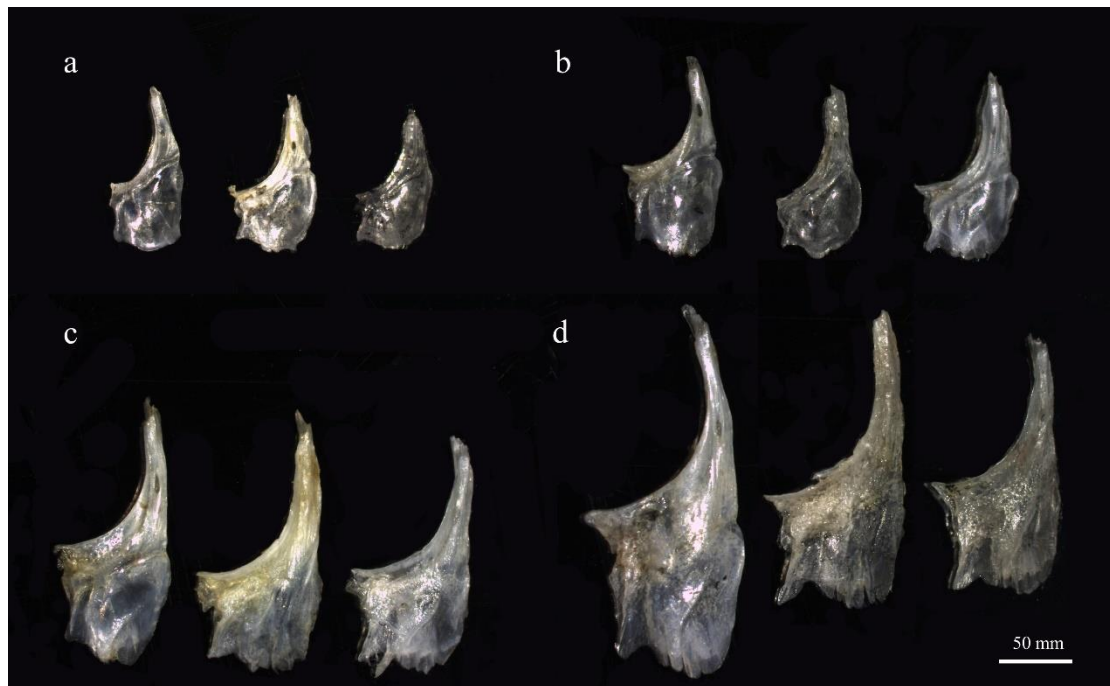

**Figure S3.** The frontal bone of *C. altivelis* and closely related species at different developmental stages.  
a: S0 (3-4cm) stage; b: S1 (5-6cm) stage; c: S2 (7-8cm) stage; d: S3 (9-10cm) stage; left: *C. altivelis*; middle: *E. coioides*; right: *E. lanceolatus*.
